# Supplementary material for: Secreted Factors from Colorectal and Prostate Cancer Cells Skew the Immune Response in Opposite Directions
Source: PubMed Central journal article supplement (PMC4621525; doi:10.1038/srep15651), 2015-10-27
Supplement: srep15651-s1.pdf [file srep15651-s1.pdf]

# **Supplementary Information**

## **“Secreted Factors from Colorectal and Prostate Cancer Cells Skew the Immune Response in Opposite Directions”**

**Marie Lundholm<sup>1</sup>, Christina Hägglöf<sup>1</sup>, Maria L. Wikberg<sup>1</sup>, Pär Stattin<sup>2</sup>, Lars  
Egevad<sup>3</sup>, Anders Bergh<sup>1</sup>, Pernilla Wikström<sup>1</sup>, Richard Palmqvist<sup>1</sup>, and Sofia  
Edin<sup>1,\*</sup>**

<sup>1</sup>Department of Medical Biosciences, Pathology, Umeå University, Umeå, Sweden.

<sup>2</sup>Department of Surgical and Perioperative Sciences, Urology and Andrology, Umeå University, Umeå, Sweden.

<sup>3</sup>Department of Oncology-Pathology, Karolinska Institute, Stockholm, Sweden.

\*sofia.edin@umu.se

Supplementary Figure S1

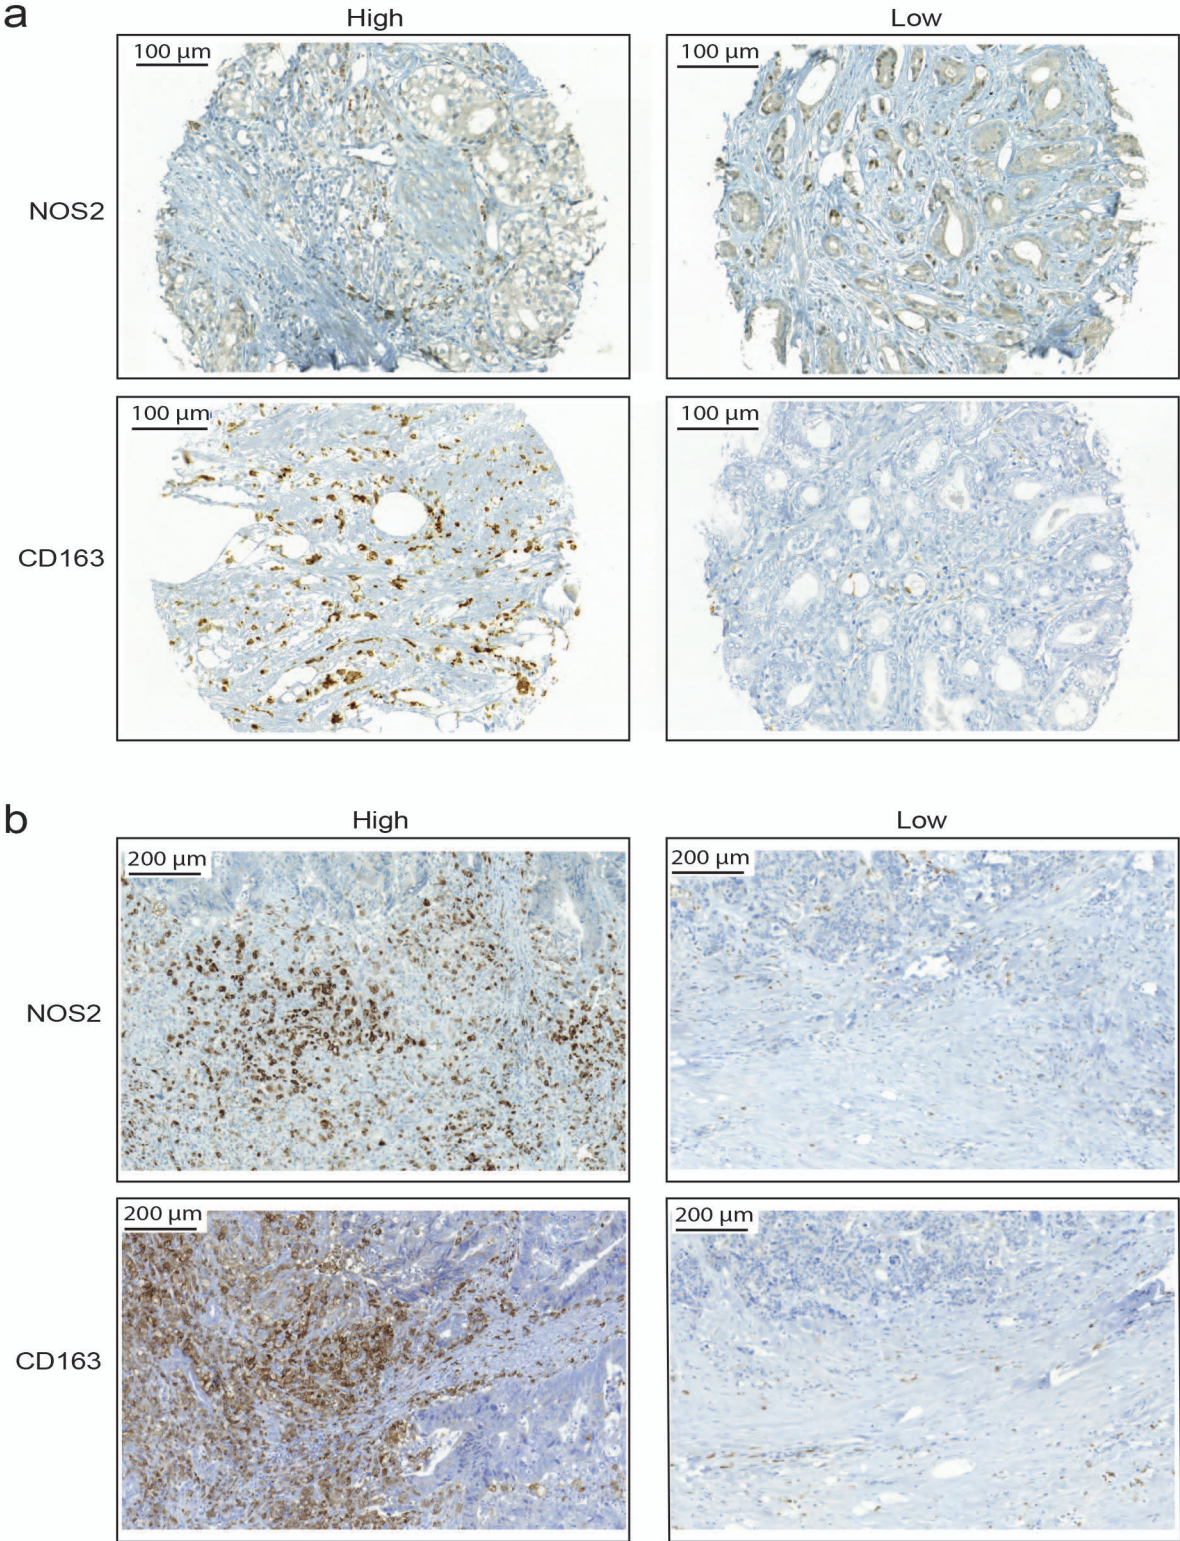

## Supplementary Figure S2

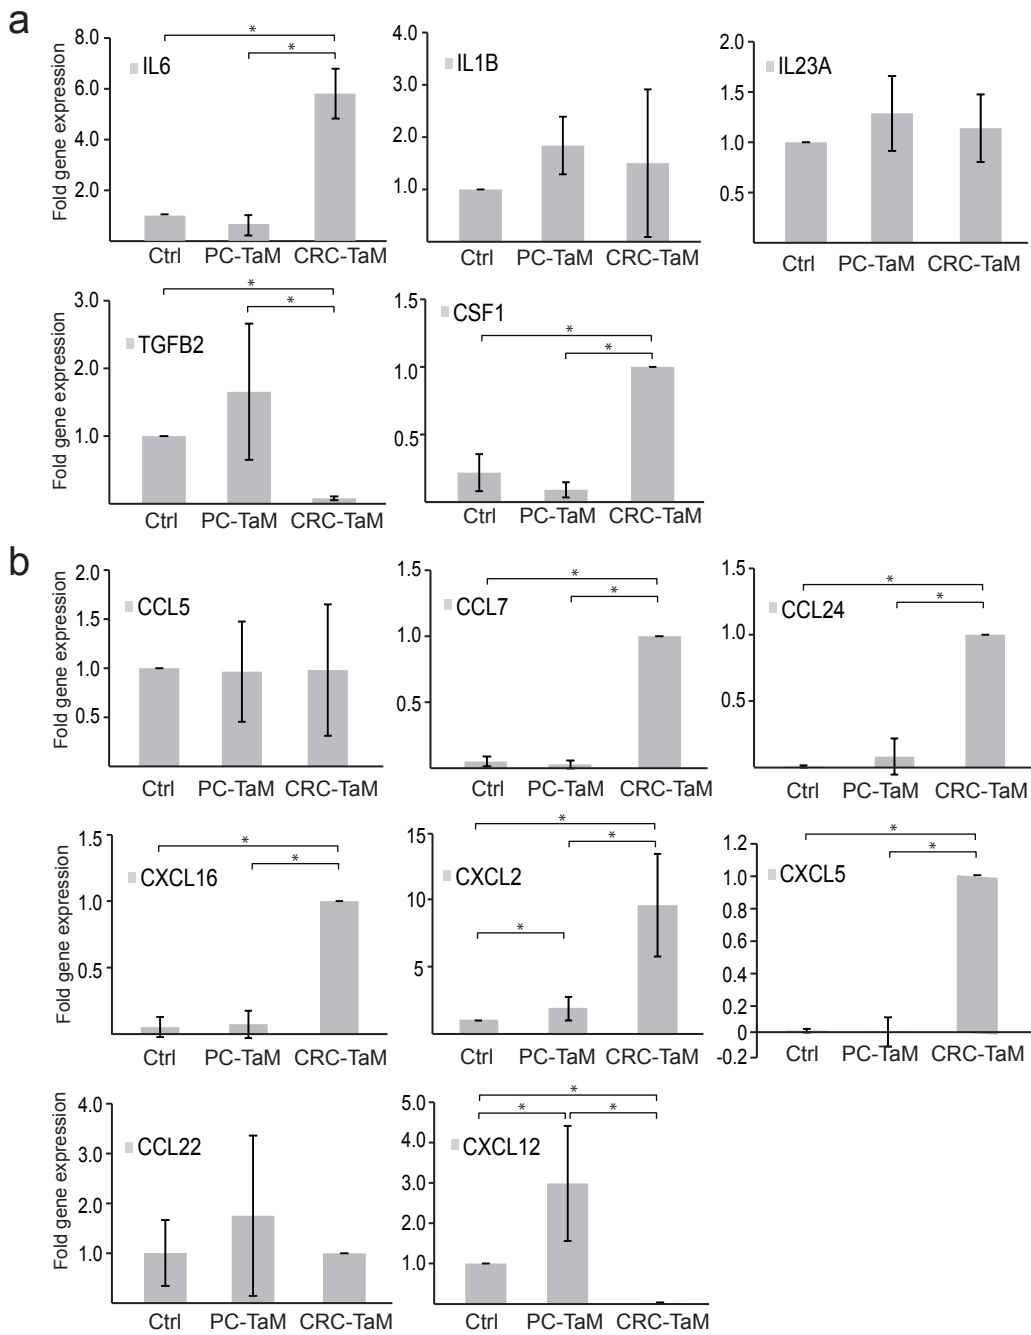

### Supplementary Figure S3

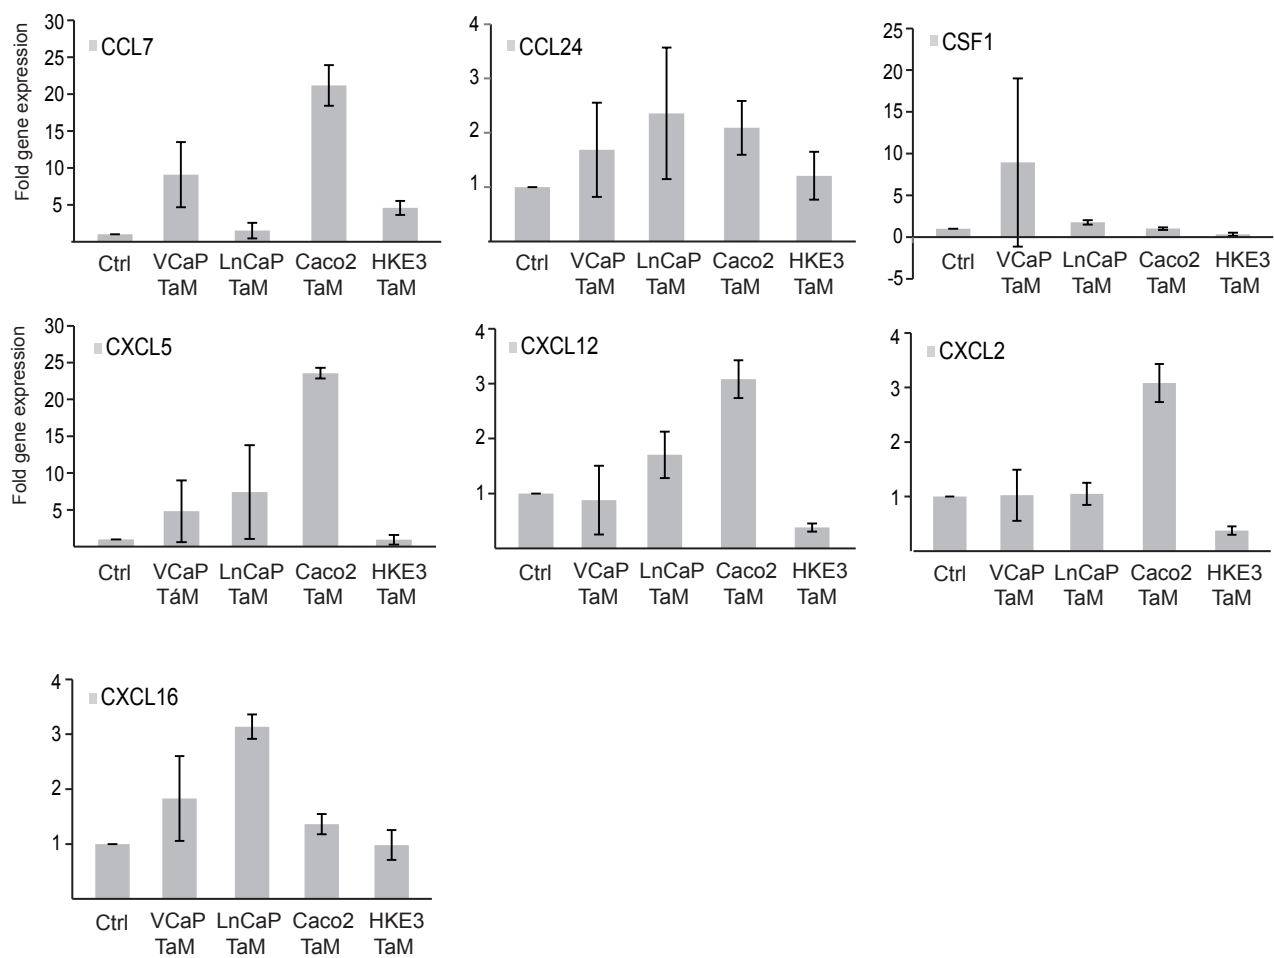

## Supplementary Figure Legends

**Figure S1.** Representative images of immunohistological staining of NOS2 and CD163. Shown are tumor specimens with high and low infiltration of immunoreactive macrophages in PC (a) and CRC (b).

**Figure S2.** Expression of cytokine and chemokine genes by TAMs. Gene expression of differentiated macrophages (Ctrl) or PC-TAMs or CRC-TAMs was analyzed by RT-PCR. Shown is the fold gene expression from three or more independent experiments  $\pm$  SD, with Ctrl macrophages or CRC-TAMs set as 1. Significant differences are indicated by \* ( $P \leq 0.05$ ). (A) Expression of proinflammatory and immunosuppressive cytokines. (B) Expression of chemokines associated with Th1/CTL and Th2/Treg recruitment and polarization.

**Figure S3.** Expression of cytokines and chemokines in TAMs induced by conditioned medium from PC cells VCaP (VCaP-TAM) and LnCAP (LnCaP-TAM), or CRC cells Caco2 (Caco2-TAM) and HKE3 (HKE3-TAM). Gene expression was analyzed by RT-PCR. Shown is the fold gene expression  $\pm$  SD with Ctrl macrophages set as 1.

**Supplementary Table S1.** Cytokine and chemokine expression in differentiated macrophages (Ctrl), PC-TaMs and CRC-TaMs.

| <b>Gene symbol</b> | <b>Ctrl</b> | <b>PC-TaM</b> | <b>CRC-TaM</b> |
|--------------------|-------------|---------------|----------------|
| <i>ADIPOQ</i>      | 1,62E-05    | 2,26E-05      | 2,00E-05       |
| <i>BMP2</i>        | 4,18E-04    | 8,24E-05      | 2,00E-05       |
| <i>BMP4</i>        | 4,15E-05    | 2,26E-05      | 2,00E-05       |
| <i>BMP6</i>        | 1,62E-05    | 2,26E-05      | 2,28E-04       |
| <i>BMP7</i>        | 1,62E-05    | 2,26E-05      | 2,00E-05       |
| <i>C5</i>          | 3,51E-03    | 3,64E-03      | 6,83E-03       |
| <i>CCL1</i>        | 1,62E-05    | 1,22E-04      | 7,57E-04       |
| <i>CCL11</i>       | 6,29E-05    | 2,33E-04      | 3,13E-05       |
| <i>CCL13</i>       | 6,37E-04    | 7,32E-04      | 2,30E+00       |
| <i>CCL17</i>       | 1,62E-05    | 2,26E-05      | 1,02E-04       |
| <i>CCL18</i>       | 6,54E-04    | 1,74E-03      | 5,92E-02       |
| <i>CCL19</i>       | 1,62E-05    | 2,26E-05      | 6,48E-05       |
| <i>CCL2</i>        | 1,52E+0     | 1,57E+00      | 2,09E+00       |
| <i>CCL20</i>       | 1,62E-05    | 9,94E-05      | 2,30E-04       |
| <i>CCL21</i>       | 1,62E-05    | 2,26E-05      | 4,97E-05       |
| <i>CCL22</i>       | 1,71E-04    | 1,28E-03      | 4,69E-04       |
| <i>CCL24</i>       | 1,43E-04    | 1,35E-04      | 1,63E-01       |
| <i>CCL3</i>        | 3,79E-03    | 1,71E-02      | 7,73E-03       |
| <i>CCL5</i>        | 1,18E-03    | 3,40E-03      | 4,86E-03       |
| <i>CCL7</i>        | 1,80E-04    | 6,93E-04      | 3,68E-01       |
| <i>CCL8</i>        | 1,62E-05    | 2,26E-05      | 8,04E-05       |
| <i>CD40LG</i>      | 2,10E-04    | 2,40E-04      | 3,19E-04       |
| <i>CNTF</i>        | 3,03E-03    | 1,12E-03      | 2,15E-03       |
| <i>CSF1</i>        | 2,39E-04    | 7,01E-04      | 6,34E-03       |
| <i>CSF2</i>        | 4,96E-05    | 2,68E-04      | 6,67E-05       |
| <i>CSF3</i>        | 3,79E-04    | 4,24E-04      | 4,01E-04       |
| <i>CX3CL1</i>      | 5,77E-05    | 1,20E-04      | 2,00E-05       |
| <i>CXCL1</i>       | 1,18E-02    | 2,93E-02      | 5,69E-02       |
| <i>CXCL10</i>      | 1,11E-03    | 4,06E-04      | 9,40E-04       |
| <i>CXCL11</i>      | 1,62E-05    | 2,26E-05      | 2,00E-05       |
| <i>CXCL12</i>      | 1,92E-04    | 1,00E-03      | 2,00E-05       |
| <i>CXCL13</i>      | 4,00E-05    | 2,26E-05      | 1,13E-04       |
| <i>CXCL16</i>      | 1,07E-02    | 3,36E-02      | 5,87E-02       |
| <i>CXCL2</i>       | 2,23E-02    | 8,57E-02      | 2,31E-01       |
| <i>CXCL5</i>       | 5,40E-04    | 6,18E-03      | 2,95E+00       |
| <i>CXCL9</i>       | 3,27E-05    | 3,53E-05      | 5,58E-05       |
| <i>FASLG</i>       | 1,62E-05    | 2,26E-05      | 2,00E-05       |
| <i>GPI</i>         | 1,06E-01    | 1,38E-01      | 1,62E-01       |
| <i>IFNA2</i>       | 1,62E-05    | 2,26E-05      | 2,00E-05       |
| <i>IFNG</i>        | 1,62E-05    | 2,26E-05      | 2,00E-05       |
| <i>IL10</i>        | 6,26E-03    | 7,76E-03      | 4,54E-03       |
| <i>IL11</i>        | 1,62E-05    | 2,26E-05      | 2,00E-05       |
| <i>IL12A</i>       | 1,62E-05    | 1,07E-04      | 2,00E-05       |
| <i>IL12B</i>       | 1,62E-05    | 2,26E-05      | 9,61E-05       |
| <i>IL13</i>        | 1,02E-04    | 1,80E-04      | 1,94E-04       |

|                 |          |          |          |
|-----------------|----------|----------|----------|
| <i>IL15</i>     | 1,28E-03 | 1,20E-03 | 3,46E-03 |
| <i>IL16</i>     | 1,84E-02 | 2,88E-02 | 2,07E-02 |
| <i>IL17A</i>    | 1,62E-05 | 2,26E-05 | 2,00E-05 |
| <i>IL17F</i>    | 1,62E-05 | 2,26E-05 | 2,00E-05 |
| <i>IL18</i>     | 9,35E-02 | 7,55E-02 | 7,84E-02 |
| <i>IL1A</i>     | 1,39E-03 | 3,09E-04 | 1,73E-03 |
| <i>IL1B</i>     | 2,11E-03 | 2,49E-03 | 1,51E-02 |
| <i>IL1RN</i>    | 6,22E-03 | 1,16E-02 | 1,98E-01 |
| <i>IL2</i>      | 1,62E-05 | 2,26E-05 | 2,00E-05 |
| <i>IL21</i>     | 4,35E-05 | 1,12E-04 | 9,12E-05 |
| <i>IL22</i>     | 1,09E-04 | 1,59E-04 | 2,19E-04 |
| <i>IL23A</i>    | 5,73E-04 | 1,99E-04 | 5,23E-04 |
| <i>IL24</i>     | 2,07E-05 | 1,24E-04 | 1,05E-04 |
| <i>IL27</i>     | 1,13E-04 | 1,13E-04 | 4,14E-04 |
| <i>IL3</i>      | 1,62E-05 | 2,26E-05 | 2,00E-05 |
| <i>IL4</i>      | 5,82E-05 | 2,26E-05 | 2,00E-05 |
| <i>IL5</i>      | 1,62E-05 | 2,26E-05 | 1,47E-04 |
| <i>IL6</i>      | 1,47E-03 | 3,72E-04 | 9,96E-03 |
| <i>IL7</i>      | 1,03E-03 | 6,60E-04 | 4,30E-04 |
| <i>IL8</i>      | 7,16E-03 | 9,99E-02 | 5,29E-01 |
| <i>IL9</i>      | 2,21E-05 | 4,11E-05 | 1,73E-04 |
| <i>LIF</i>      | 1,55E-04 | 1,10E-04 | 2,39E-04 |
| <i>LTA</i>      | 1,62E-05 | 2,31E-05 | 2,00E-05 |
| <i>LTB</i>      | 5,30E-04 | 4,96E-04 | 3,93E-03 |
| <i>MIF</i>      | 1,71E-01 | 1,69E-01 | 3,29E-01 |
| <i>MSTN</i>     | 2,20E-05 | 2,95E-05 | 2,00E-05 |
| <i>NODAL</i>    | 1,34E-04 | 8,25E-05 | 2,38E-04 |
| <i>OSM</i>      | 4,54E-03 | 1,98E-03 | 2,59E-03 |
| <i>PPBP</i>     | 6,49E-04 | 2,43E-03 | 1,75E+01 |
| <i>SPP1</i>     | 7,30E-01 | 3,15E-01 | 1,13E+00 |
| <i>TGFB2</i>    | 4,22E-03 | 3,35E-03 | 5,13E-04 |
| <i>THPO</i>     | 1,62E-05 | 2,26E-05 | 2,00E-05 |
| <i>TNF</i>      | 9,60E-03 | 7,12E-03 | 1,39E-02 |
| <i>TNFRSF11</i> | 1,62E-05 | 2,26E-05 | 2,14E-05 |
| <i>TNFSF10</i>  | 1,15E-02 | 1,25E-02 | 6,32E-02 |
| <i>TNFSF11</i>  | 1,56E-04 | 3,62E-04 | 9,55E-05 |
| <i>TNFSF13B</i> | 3,63E-02 | 2,74E-02 | 3,87E-02 |
| <i>VEGFA</i>    | 4,27E-03 | 6,79E-03 | 1,75E-02 |
| <i>XCL1</i>     | 1,62E-05 | 2,26E-05 | 2,00E-05 |

---

Normalized expression of cytokine and chemokine genes, according to the  $2^{-\Delta\Delta Ct}$  ( $Ct(GOI) - Ave Ct(HKG)$ ) data analysis method. GOI; Gene of interest, HKG; House keeping gene.
